# Supplementary material for: Integrated Transcriptomics and Metabolomics Reveal Changes in Cell Homeostasis and Energy Metabolism in Trachinotus ovatus in Response to Acute Hypoxic Stress
Source: MDPI journal article supplement (doi:10.3390/ijms25021054), 2024-01-15
Supplement: s1 [file s1]

Supplementary Figures and Tables

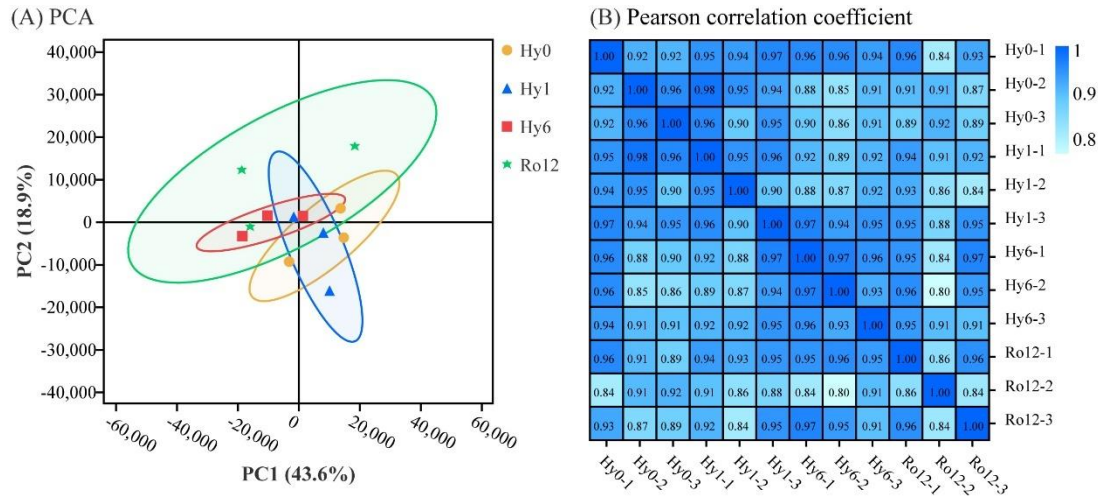

**Figure S1.** (A) Principal components analysis (PCA) and (B) Pearson's correlation coefficient between samples.



(See Fig. S2 on previous page.)

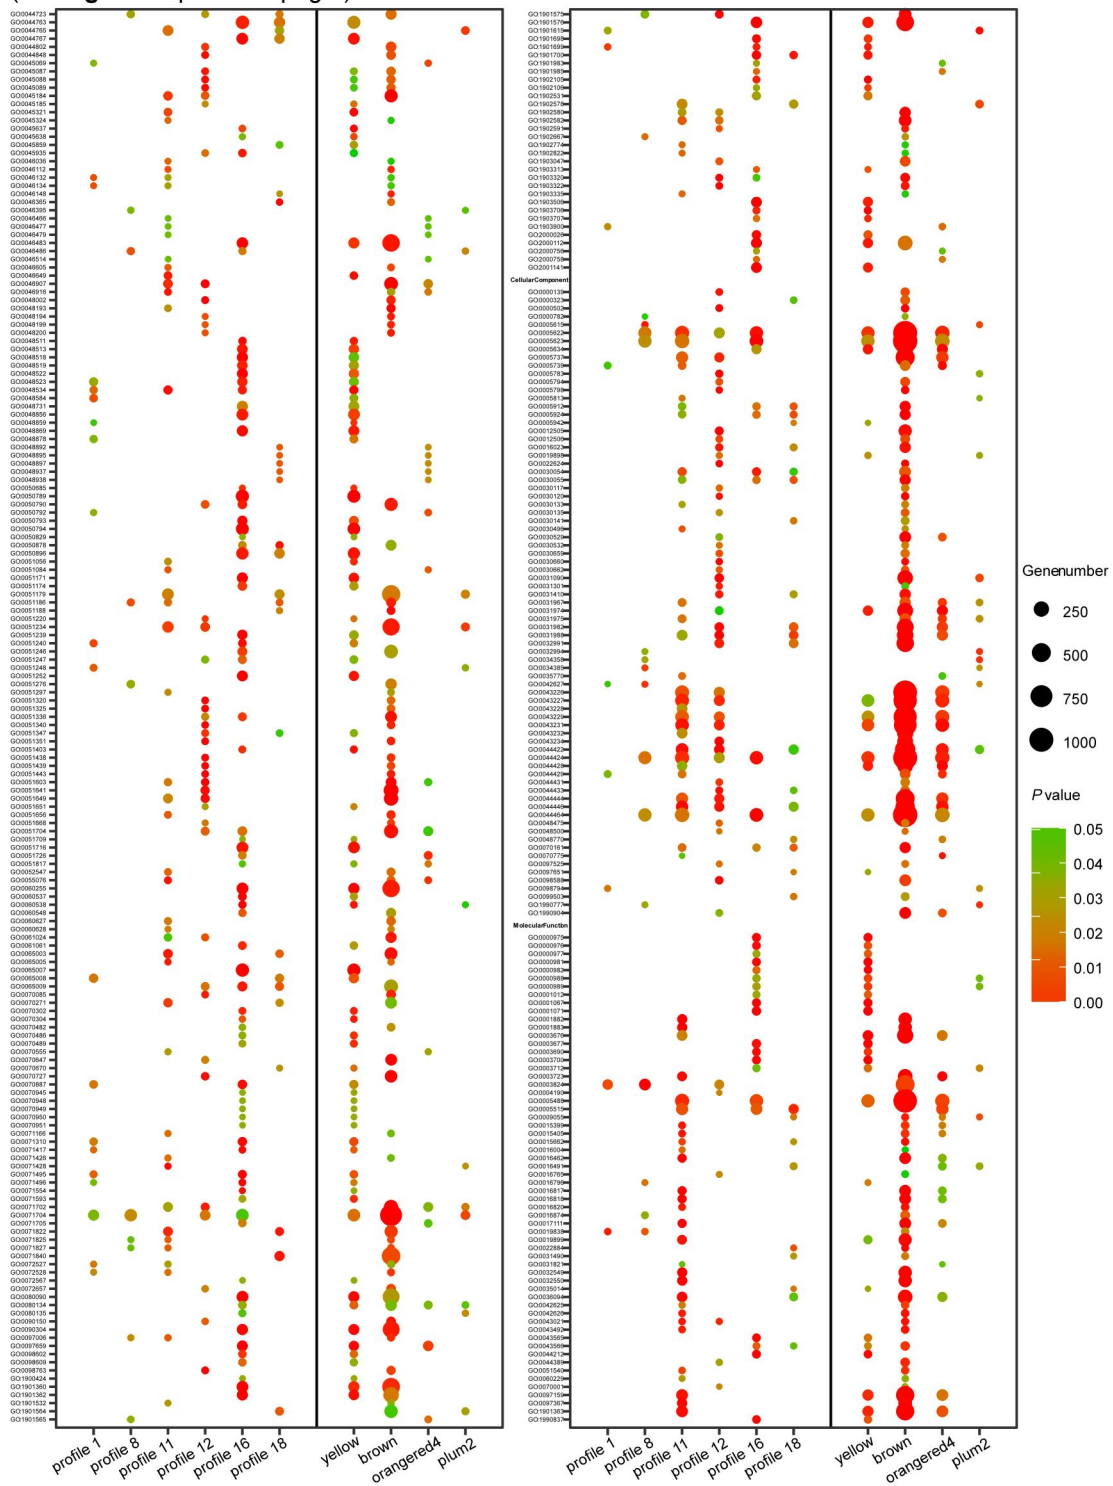

**Figure S2.** GO enrichment analysis. (A) Venn diagram of significant GO terms ( $P < 0.05$ ) between six significant gene expression profiles (red circles) and four highly correlated modules (green circles). (B) Venn diagrams of significant GO term classifications. (C) The 686 common GO terms of significant profiles and highly correlated modules.



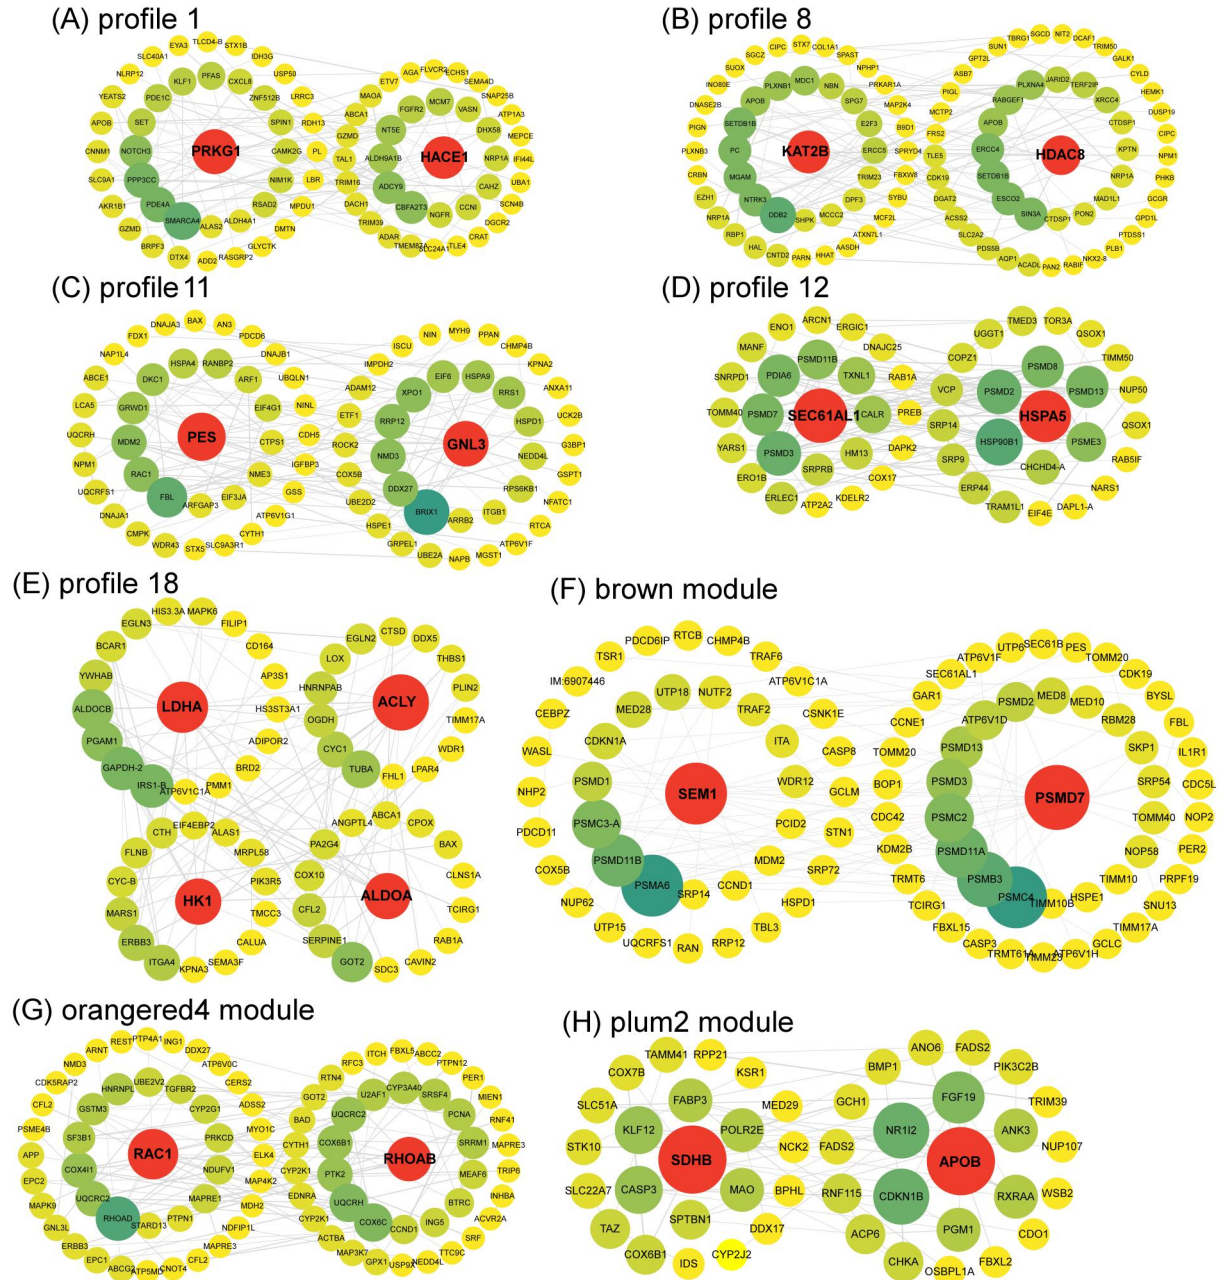

**Figure S3.** Protein-protein interaction (PPI) network analysis. The visualization of the first 100 interactions of profile 1 (A), profile 8 (B), profile 11 (C), profile 12 (D), profile 18 (E), brown module (F), orangered4 module (G), and plum2 module (H). The nodes represent genes; nodes size and color are related to the degree attribute of the PPI network; and larger size and deeper color indicate higher connectivity between genes. The edges indicate the connectivity between genes, the size of the edges is correlated with the combined score attribute, with a larger size representing a higher combined score.

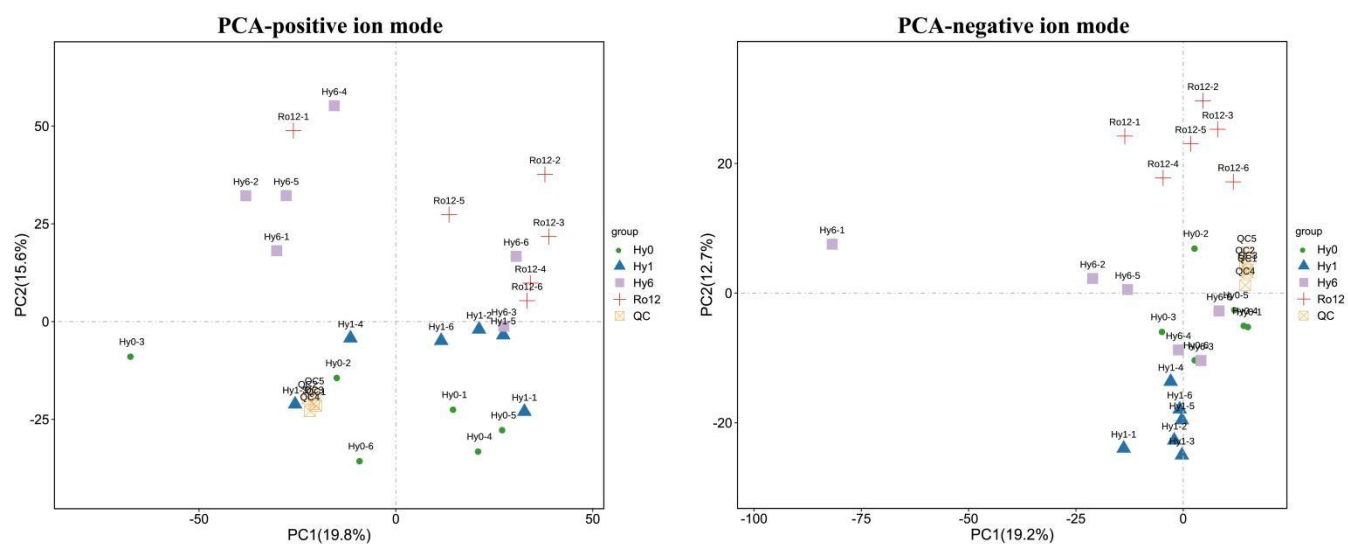

**Figure S4.** PCA analysis between treatment groups and QC sample under positive and negative ion modes.

**(A) OPLS-DA under positive ion mode**  
Hy0 vs. Hy1

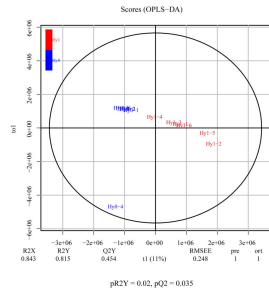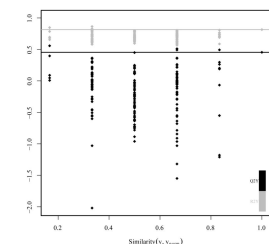

Hy0 vs. Hy6

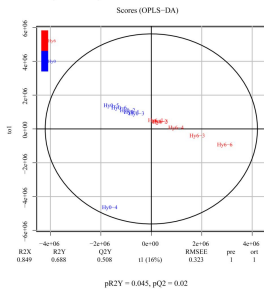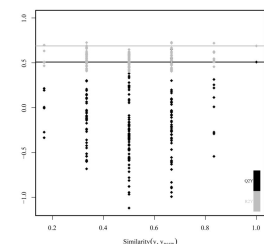

Hy0 vs. Ro12

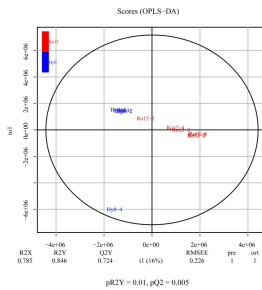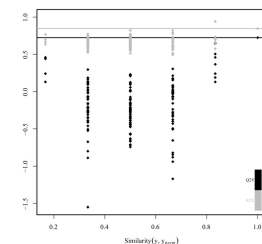

Hy6 vs. Ro12

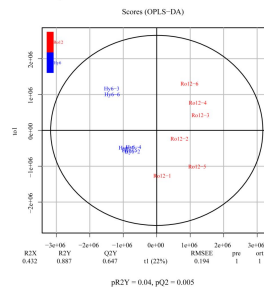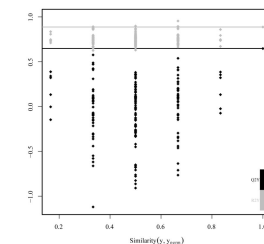

**(B) OPLS-DA under negative ion mode**  
Hy0 vs. Hy1

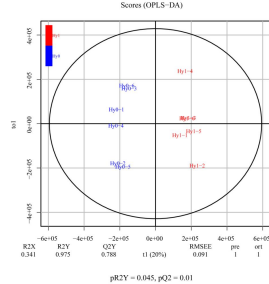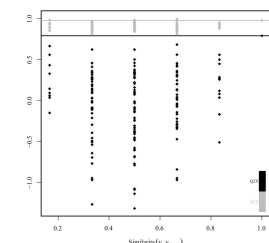

Hy0 vs. Hy6

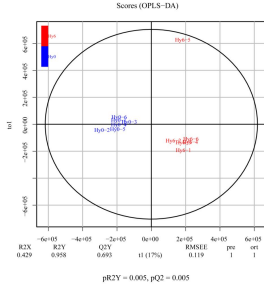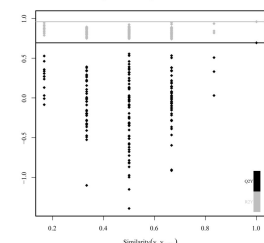

Hy0 vs. Ro12

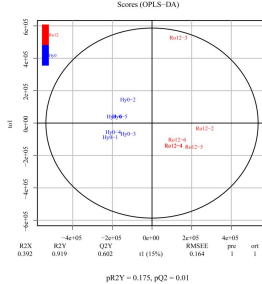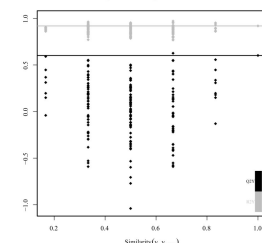

Hy6 vs. Ro12

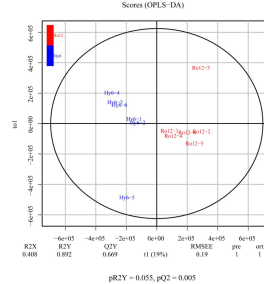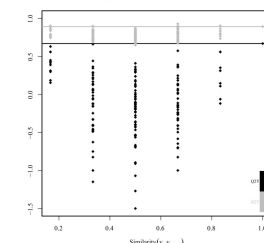

**Figure S5.** Orthogonal projection to latent structure-discriminant analysis (OPLS-DA) and permutation test under positive (A) and negative (B) ion modes.

**Table S1** Specific gene number of 18 weighted gene co-expression network analysis (WGCNA) modules.

| Module            | Gene number  | Module        | Gene number | Module       | Gene number |
|-------------------|--------------|---------------|-------------|--------------|-------------|
| <b>brown</b>      | <b>2,215</b> | darkturquoise | 432         | darkorange   | 153         |
| lightsteelblue1   | 1,999        | darkorange2   | 418         | violet       | 137         |
| brown4            | 1,315        | darkmagenta   | 366         | bisque4      | 93          |
| black             | 615          | darkred       | 356         | <b>plum2</b> | <b>89</b>   |
| lightpink4        | 502          | <b>yellow</b> | <b>344</b>  | thistle1     | 81          |
| <b>orangered4</b> | <b>433</b>   | green         | 335         | grey         | 5           |

**Table S2** Identification of metabolites under positive and negative ion modes.

| Mode              | Total | MS1 | MS2 | Known (MS1+ MS2) | Unknown |
|-------------------|-------|-----|-----|------------------|---------|
| Positive ion mode | 4,114 | 721 | 368 | 1,089            | 3,025   |
| Negative ion mode | 1,811 | 419 | 104 | 523              | 1,288   |

**Table S3** The parameters of orthogonal partial least squares-discriminant analysis (OPLS-DA) model in Hy0 vs. Hy1, Hy0 vs. Hy6, Hy0 vs. Ro12, and Hy6 vs. Ro12 groups.

| Mode              | Group        | R <sup>2</sup> X | R <sup>2</sup> Y | Q <sup>2</sup> Y |
|-------------------|--------------|------------------|------------------|------------------|
| Positive ion mode | Hy0 vs. Hy1  | 0.843            | 0.815            | 0.454            |
|                   | Hy0 vs. Hy6  | 0.849            | 0.688            | 0.508            |
|                   | Hy0 vs. Ro12 | 0.785            | 0.846            | 0.724            |
|                   | Hy6 vs. Ro12 | 0.432            | 0.887            | 0.647            |
| Negative ion mode | Hy0 vs. Hy1  | 0.341            | 0.975            | 0.788            |
|                   | Hy0 vs. Hy6  | 0.429            | 0.958            | 0.693            |
|                   | Hy0 vs. Ro12 | 0.392            | 0.919            | 0.602            |
|                   | Hy6 vs. Ro12 | 0.408            | 0.892            | 0.669            |

**Table S4** Specific primer sequences of ten randomly selected genes and one reference gene for qRT-PCR validation.

| Condition                                        | Parameters                                           |
|--------------------------------------------------|------------------------------------------------------|
| <b>UHPLC systems</b>                             |                                                      |
| Column temperature                               | 40 °C                                                |
| Chromatographic separation                       | Hypesil Gold column (C18)                            |
| Flow rate                                        | 17-min linear gradient with 0.2 mL·min <sup>-1</sup> |
| Positive ion mode: mobile phase A                | 0.1% formic acid in water                            |
| Positive ion mode: mobile phase B                | Methanol                                             |
| Negative ion mode: mobile phase A                | 5 mM ammonium bicarbonate in water (pH = 9.0)        |
| Negative ion mode: mobile phase B                | Methanol                                             |
| <b>Mass spectrometer</b>                         |                                                      |
| Type                                             | Electrospray ion source (ESI)                        |
| Electrospray voltage of positive ion mode (ESI+) | 3.2 kV                                               |
| Electrospray voltage of negative ion mode (ESI-) | 2.5 kV                                               |
| Ion source temperature                           | 320 °C                                               |
| Sheath gas flow rate                             | 40 arb                                               |
| Aux gas flow rate                                | 10 arb                                               |
| Full scan                                        | 70,000 resolution                                    |
| Scan range                                       | 80–1,000 m/z                                         |
| Collision voltage                                | 30 eV                                                |



**Table S5** Specific primer sequences of ten randomly selected genes and one reference gene for qRT-PCR validation.

| Gene_id                    | Gene_symbol     | Forward primer (5'-3') | Reverse primer (5'-3') |
|----------------------------|-----------------|------------------------|------------------------|
| /                          | $\beta$ -actin* | CGTGCGTGACATCAAGGAGAA  | AAGGAAGGAAGGCTGGAAGAGG |
| SCSFRI_TO_T_00039016.path1 | <i>FOS</i>      | GTCACCAGCGGGATCTTACTC  | GAAATGGCTGTGACAGTGGG   |
| SCSFRI_TO_T_00009724.path1 | <i>BAX</i>      | AGGGTGGTCGCACTGTTCTA   | CAAGAAGACCCCAACGTCT    |
| SCSFRI_TO_T_00117137.path1 | <i>MCL1</i>     | ACCGATGTGTCGAGTTGTCC   | TTTCCAAAACGCCGTCCAC    |
| SCSFRI_TO_T_00065768.path1 | <i>CYC-B</i>    | GGTCTGTTGGACGCAAGAC    | CTTCTTTTGTGCGCGCGAA    |
| SCSFRI_TO_T_00046973.path1 | <i>HSP70</i>    | ATACCTCGGGCAACGTTTCAG  | GTCCACCGCAGATACGTTCA   |
| SCSFRI_TO_T_00135876.path1 | <i>ALDOA</i>    | AGAAGACGGATGACGCAAG    | GTCCAGACCTTGAGTGGTCG   |
| SCSFRI_TO_T_00089332.path1 | <i>LDHA</i>     | CGTCAAGTACAGCCCCAACT   | TCTCCAATGATCCAGCCGTG   |
| SCSFRI_TO_T_00015468.path1 | <i>PCK1</i>     | AACAACGGCCCTGTAACCC    | TTGGCGATACGTGAGGCAAT   |
| SCSFRI_TO_T_00000587.path1 | <i>PNPLA2</i>   | GCCAAGGTGTCTGAGATGCT   | GTGTCGGTACACCTCACCAG   |
| SCSFRI_TO_T_00095046.path1 | <i>ACSL4</i>    | GCGAGTTTGGCAGTGGATTG   | AGCAATAGCCTCCTCTCCGA   |

\*Reference: Chen et al., 2017.
